# Supplementary material
Source: MDPI journal article supplement (https://www.mdpi.com/2076-3263/13/4/98)
Supplement: s1 [file s1]

**Table S1.** Critical intersections for slope dip direction between 120° - 140° και 20° - 248° for the island of Thasos.

| Intersection ID | Trend  | Plunge | Dip1  | DipDirection1 | Dip2  | DipDirection2 |
|-----------------|--------|--------|-------|---------------|-------|---------------|
| 1               | 59.26  | 14.76  | 66.00 | 330.00        | 36.00 | 123.00        |
| 2               | 60.58  | 11.99  | 66.00 | 330.00        | 29.00 | 123.00        |
| 3               | 61.82  | 9.30   | 66.00 | 330.00        | 31.00 | 130.00        |
| 4               | 58.69  | 15.94  | 66.00 | 330.00        | 56.00 | 132.00        |
| 5               | 59.91  | 13.41  | 66.00 | 330.00        | 60.00 | 137.00        |
| 6               | 52.22  | 10.12  | 19.00 | 105.00        | 36.00 | 123.00        |
| 7               | 62.07  | 12.75  | 19.00 | 105.00        | 29.00 | 123.00        |
| 8               | 72.74  | 15.13  | 19.00 | 105.00        | 31.00 | 130.00        |
| 9               | 55.23  | 10.96  | 19.00 | 105.00        | 56.00 | 132.00        |
| 10              | 59.04  | 11.98  | 19.00 | 105.00        | 60.00 | 137.00        |
| 11              | 59.90  | 15.16  | 19.00 | 92.00         | 36.00 | 123.00        |
| 12              | 78.56  | 17.99  | 19.00 | 92.00         | 37.00 | 138.00        |
| 13              | 71.15  | 17.08  | 19.00 | 92.00         | 29.00 | 123.00        |
| 14              | 78.75  | 18.01  | 19.00 | 92.00         | 31.00 | 130.00        |
| 15              | 57.84  | 14.74  | 19.00 | 92.00         | 56.00 | 132.00        |
| 16              | 61.15  | 15.41  | 19.00 | 92.00         | 60.00 | 137.00        |
| 17              | 97.13  | 31.93  | 87.00 | 3.00          | 57.00 | 25.00         |
| 18              | 93.62  | 60.78  | 87.00 | 3.00          | 66.00 | 47.00         |
| 19              | 97.13  | 31.95  | 87.00 | 3.00          | 36.00 | 123.00        |
| 20              | 97.39  | 28.22  | 87.00 | 3.00          | 37.00 | 138.00        |
| 21              | 93.15  | 62.77  | 87.00 | 3.00          | 71.00 | 138.00        |
| 22              | 97.52  | 26.21  | 87.00 | 3.00          | 29.00 | 123.00        |
| 23              | 97.59  | 25.21  | 87.00 | 3.00          | 31.00 | 130.00        |
| 24              | 95.58  | 48.66  | 87.00 | 3.00          | 56.00 | 132.00        |
| 25              | 93.62  | 60.78  | 87.00 | 3.00          | 74.00 | 149.00        |
| 26              | 95.42  | 49.97  | 87.00 | 3.00          | 60.00 | 137.00        |
| 27              | 79.85  | 45.38  | 83.00 | 351.00        | 57.00 | 25.00         |
| 28              | 83.36  | 27.34  | 83.00 | 351.00        | 36.00 | 123.00        |
| 29              | 84.23  | 21.47  | 83.00 | 351.00        | 37.00 | 138.00        |
| 30              | 78.12  | 51.51  | 83.00 | 351.00        | 71.00 | 138.00        |
| 31              | 84.12  | 22.25  | 83.00 | 351.00        | 29.00 | 123.00        |
| 32              | 84.37  | 20.46  | 83.00 | 351.00        | 31.00 | 130.00        |
| 33              | 81.08  | 40.04  | 83.00 | 351.00        | 56.00 | 132.00        |
| 34              | 80.13  | 44.25  | 83.00 | 351.00        | 74.00 | 149.00        |
| 35              | 81.07  | 40.08  | 83.00 | 351.00        | 60.00 | 137.00        |
| 36              | 115.93 | 47.00  | 89.00 | 21.00         | 66.00 | 47.00         |
| 37              | 115.72 | 51.89  | 89.00 | 21.00         | 77.00 | 184.00        |
| 38              | 114.67 | 66.78  | 89.00 | 21.00         | 81.00 | 177.00        |
| 39              | 115.37 | 58.41  | 89.00 | 21.00         | 69.00 | 58.00         |
| 40              | 116.29 | 35.43  | 89.00 | 21.00         | 36.00 | 123.00        |
| 41              | 114.50 | 68.17  | 89.00 | 21.00         | 76.00 | 57.00         |
| 42              | 116.31 | 34.68  | 89.00 | 21.00         | 37.00 | 138.00        |
| 43              | 114.32 | 69.50  | 89.00 | 21.00         | 71.00 | 138.00        |
| 44              | 116.44 | 29.40  | 89.00 | 21.00         | 29.00 | 123.00        |
| 45              | 116.43 | 29.52  | 89.00 | 21.00         | 31.00 | 130.00        |
| 46              | 115.58 | 54.91  | 89.00 | 21.00         | 56.00 | 132.00        |
| 47              | 115.45 | 57.16  | 89.00 | 21.00         | 60.00 | 137.00        |
| 48              | 98.38  | 30.63  | 57.00 | 25.00         | 81.00 | 177.00        |
| 49              | 97.11  | 31.94  | 57.00 | 25.00         | 36.00 | 123.00        |
| 50              | 99.71  | 29.21  | 57.00 | 25.00         | 37.00 | 138.00        |
| 51              | 75.07  | 47.89  | 57.00 | 25.00         | 71.00 | 138.00        |
| 52              | 101.56 | 27.13  | 57.00 | 25.00         | 29.00 | 123.00        |
| 53              | 102.10 | 26.51  | 57.00 | 25.00         | 31.00 | 130.00        |
| 54              | 84.50  | 42.49  | 57.00 | 25.00         | 56.00 | 132.00        |
| 55              | 80.53  | 44.98  | 57.00 | 25.00         | 74.00 | 149.00        |
| 56              | 84.19  | 42.70  | 57.00 | 25.00         | 60.00 | 137.00        |
| 57              | 56.44  | 12.94  | 79.00 | 323.00        | 36.00 | 123.00        |
| 58              | 57.01  | 10.12  | 79.00 | 323.00        | 29.00 | 123.00        |
| 59              | 57.65  | 6.92   | 79.00 | 323.00        | 31.00 | 130.00        |

|     |        |       |       |        |       |        |
|-----|--------|-------|-------|--------|-------|--------|
| 60  | 56.47  | 12.78 | 79.00 | 323.00 | 56.00 | 132.00 |
| 61  | 57.24  | 8.99  | 79.00 | 323.00 | 60.00 | 137.00 |
| 62  | 114.03 | 48.77 | 66.00 | 47.00  | 77.00 | 184.00 |
| 63  | 105.98 | 54.81 | 66.00 | 47.00  | 81.00 | 177.00 |
| 64  | 125.06 | 35.96 | 66.00 | 47.00  | 36.00 | 123.00 |
| 65  | 124.75 | 36.41 | 66.00 | 47.00  | 37.00 | 138.00 |
| 66  | 91.06  | 61.67 | 66.00 | 47.00  | 71.00 | 138.00 |
| 67  | 128.81 | 30.00 | 66.00 | 47.00  | 29.00 | 123.00 |
| 68  | 128.36 | 30.77 | 66.00 | 47.00  | 31.00 | 130.00 |
| 69  | 108.38 | 53.24 | 66.00 | 47.00  | 56.00 | 132.00 |
| 70  | 104.91 | 55.47 | 66.00 | 47.00  | 87.00 | 186.00 |
| 71  | 93.63  | 60.78 | 66.00 | 47.00  | 74.00 | 149.00 |
| 72  | 106.33 | 54.60 | 66.00 | 47.00  | 60.00 | 137.00 |
| 73  | 82.73  | 27.08 | 29.00 | 55.00  | 36.00 | 123.00 |
| 74  | 91.31  | 25.34 | 29.00 | 55.00  | 37.00 | 138.00 |
| 75  | 92.80  | 24.98 | 29.00 | 55.00  | 29.00 | 123.00 |
| 76  | 95.05  | 24.41 | 29.00 | 55.00  | 31.00 | 130.00 |
| 77  | 68.84  | 28.71 | 29.00 | 55.00  | 56.00 | 132.00 |
| 78  | 70.35  | 28.60 | 29.00 | 55.00  | 60.00 | 137.00 |
| 79  | 201.47 | 22.79 | 84.00 | 108.00 | 37.00 | 138.00 |
| 80  | 202.56 | 13.44 | 84.00 | 108.00 | 31.00 | 130.00 |
| 81  | 199.58 | 36.23 | 84.00 | 108.00 | 56.00 | 132.00 |
| 82  | 195.39 | 54.94 | 84.00 | 108.00 | 66.00 | 241.00 |
| 83  | 196.87 | 49.73 | 84.00 | 108.00 | 60.00 | 240.00 |
| 84  | 195.75 | 53.78 | 84.00 | 108.00 | 63.00 | 238.00 |
| 85  | 199.69 | 35.59 | 84.00 | 108.00 | 45.00 | 238.00 |
| 86  | 198.19 | 43.95 | 84.00 | 108.00 | 60.00 | 137.00 |
| 87  | 196.82 | 49.95 | 84.00 | 108.00 | 54.00 | 222.00 |
| 88  | 118.67 | 56.42 | 77.00 | 184.00 | 69.00 | 58.00  |
| 89  | 108.36 | 34.38 | 77.00 | 184.00 | 36.00 | 123.00 |
| 90  | 124.23 | 62.62 | 77.00 | 184.00 | 76.00 | 57.00  |
| 91  | 107.69 | 32.19 | 77.00 | 184.00 | 37.00 | 138.00 |
| 92  | 137.39 | 70.71 | 77.00 | 184.00 | 87.00 | 50.00  |
| 93  | 106.51 | 28.08 | 77.00 | 184.00 | 29.00 | 123.00 |
| 94  | 106.37 | 27.58 | 77.00 | 184.00 | 31.00 | 130.00 |
| 95  | 132.01 | 68.15 | 77.00 | 184.00 | 79.00 | 65.00  |
| 96  | 117.90 | 55.34 | 77.00 | 184.00 | 56.00 | 132.00 |
| 97  | 124.71 | 63.05 | 77.00 | 184.00 | 79.00 | 50.00  |
| 98  | 119.95 | 58.08 | 77.00 | 184.00 | 60.00 | 137.00 |
| 99  | 133.41 | 68.89 | 77.00 | 184.00 | 89.00 | 41.00  |
| 100 | 131.87 | 68.07 | 77.00 | 184.00 | 83.00 | 51.00  |
| 101 | 109.74 | 61.19 | 81.00 | 177.00 | 69.00 | 58.00  |
| 102 | 98.76  | 32.37 | 81.00 | 177.00 | 36.00 | 123.00 |
| 103 | 115.66 | 67.65 | 81.00 | 177.00 | 76.00 | 57.00  |
| 104 | 97.92  | 28.46 | 81.00 | 177.00 | 37.00 | 138.00 |
| 105 | 97.47  | 26.20 | 81.00 | 177.00 | 29.00 | 123.00 |
| 106 | 97.26  | 25.11 | 81.00 | 177.00 | 31.00 | 130.00 |
| 107 | 104.77 | 52.18 | 81.00 | 177.00 | 56.00 | 132.00 |
| 108 | 117.50 | 69.10 | 81.00 | 177.00 | 79.00 | 50.00  |
| 109 | 104.52 | 51.59 | 81.00 | 177.00 | 87.00 | 186.00 |
| 110 | 105.79 | 54.41 | 81.00 | 177.00 | 60.00 | 137.00 |
| 111 | 86.76  | 28.65 | 29.00 | 71.00  | 36.00 | 123.00 |
| 112 | 96.10  | 27.65 | 29.00 | 71.00  | 37.00 | 138.00 |
| 113 | 100.61 | 26.93 | 29.00 | 71.00  | 29.00 | 123.00 |
| 114 | 102.43 | 26.59 | 29.00 | 71.00  | 31.00 | 130.00 |
| 115 | 68.88  | 28.76 | 29.00 | 71.00  | 56.00 | 132.00 |
| 116 | 70.54  | 28.85 | 29.00 | 71.00  | 60.00 | 137.00 |
| 117 | 202.54 | 22.18 | 84.00 | 109.00 | 37.00 | 138.00 |
| 118 | 203.62 | 12.88 | 84.00 | 109.00 | 31.00 | 130.00 |
| 119 | 200.75 | 35.19 | 84.00 | 109.00 | 56.00 | 132.00 |
| 120 | 197.75 | 50.22 | 84.00 | 109.00 | 60.00 | 240.00 |
| 121 | 196.61 | 54.23 | 84.00 | 109.00 | 63.00 | 238.00 |
| 122 | 200.62 | 36.01 | 84.00 | 109.00 | 45.00 | 238.00 |
| 123 | 199.37 | 43.05 | 84.00 | 109.00 | 60.00 | 137.00 |

|     |        |       |       |        |       |        |
|-----|--------|-------|-------|--------|-------|--------|
| 124 | 197.75 | 50.21 | 84.00 | 109.00 | 54.00 | 222.00 |
| 125 | 138.06 | 35.58 | 69.00 | 58.00  | 36.00 | 123.00 |
| 126 | 136.69 | 37.77 | 69.00 | 58.00  | 37.00 | 138.00 |
| 127 | 98.34  | 65.07 | 69.00 | 58.00  | 71.00 | 138.00 |
| 128 | 140.71 | 30.91 | 69.00 | 58.00  | 31.00 | 130.00 |
| 129 | 119.83 | 55.65 | 69.00 | 58.00  | 56.00 | 132.00 |
| 130 | 137.51 | 36.49 | 69.00 | 58.00  | 79.00 | 50.00  |
| 131 | 105.88 | 62.72 | 69.00 | 58.00  | 87.00 | 186.00 |
| 132 | 99.59  | 64.73 | 69.00 | 58.00  | 74.00 | 149.00 |
| 133 | 116.96 | 57.49 | 69.00 | 58.00  | 60.00 | 137.00 |
| 134 | 135.16 | 40.07 | 69.00 | 58.00  | 89.00 | 41.00  |
| 135 | 142.92 | 35.07 | 36.00 | 123.00 | 76.00 | 57.00  |
| 136 | 121.52 | 35.83 | 36.00 | 123.00 | 37.00 | 138.00 |
| 137 | 143.90 | 34.94 | 36.00 | 123.00 | 87.00 | 50.00  |
| 138 | 58.81  | 14.47 | 36.00 | 123.00 | 71.00 | 138.00 |
| 139 | 185.55 | 21.30 | 36.00 | 123.00 | 31.00 | 130.00 |
| 140 | 153.69 | 33.21 | 36.00 | 123.00 | 79.00 | 65.00  |
| 141 | 56.70  | 13.11 | 36.00 | 123.00 | 56.00 | 132.00 |
| 142 | 137.75 | 35.60 | 36.00 | 123.00 | 79.00 | 50.00  |
| 143 | 169.93 | 28.39 | 36.00 | 123.00 | 66.00 | 241.00 |
| 144 | 172.65 | 27.33 | 36.00 | 123.00 | 60.00 | 240.00 |
| 145 | 169.41 | 28.59 | 36.00 | 123.00 | 63.00 | 238.00 |
| 146 | 56.32  | 12.86 | 36.00 | 123.00 | 62.00 | 327.00 |
| 147 | 180.35 | 23.93 | 36.00 | 123.00 | 45.00 | 238.00 |
| 148 | 159.34 | 31.82 | 36.00 | 123.00 | 71.00 | 231.00 |
| 149 | 163.31 | 30.66 | 36.00 | 123.00 | 66.00 | 232.00 |
| 150 | 173.03 | 27.18 | 36.00 | 123.00 | 73.00 | 248.00 |
| 151 | 103.32 | 33.43 | 36.00 | 123.00 | 87.00 | 186.00 |
| 152 | 161.06 | 31.34 | 36.00 | 123.00 | 74.00 | 236.00 |
| 153 | 159.25 | 31.85 | 36.00 | 123.00 | 77.00 | 236.00 |
| 154 | 154.30 | 33.08 | 36.00 | 123.00 | 88.00 | 237.00 |
| 155 | 51.35  | 9.52  | 36.00 | 123.00 | 82.00 | 134.00 |
| 156 | 71.10  | 21.64 | 36.00 | 123.00 | 74.00 | 149.00 |
| 157 | 154.62 | 33.00 | 36.00 | 123.00 | 77.00 | 230.00 |
| 158 | 61.71  | 16.29 | 36.00 | 123.00 | 60.00 | 137.00 |
| 159 | 156.70 | 32.51 | 36.00 | 123.00 | 67.00 | 225.00 |
| 160 | 162.72 | 30.85 | 36.00 | 123.00 | 54.00 | 222.00 |
| 161 | 181.89 | 23.18 | 36.00 | 123.00 | 23.00 | 160.00 |
| 162 | 159.26 | 31.84 | 36.00 | 123.00 | 73.00 | 233.00 |
| 163 | 61.33  | 16.05 | 36.00 | 123.00 | 18.00 | 83.00  |
| 164 | 135.28 | 35.78 | 36.00 | 123.00 | 89.00 | 41.00  |
| 165 | 142.77 | 35.09 | 36.00 | 123.00 | 83.00 | 51.00  |
| 166 | 141.78 | 37.98 | 76.00 | 57.00  | 37.00 | 138.00 |
| 167 | 144.15 | 31.69 | 76.00 | 57.00  | 87.00 | 50.00  |
| 168 | 112.26 | 69.09 | 76.00 | 57.00  | 71.00 | 138.00 |
| 169 | 144.48 | 30.72 | 76.00 | 57.00  | 31.00 | 130.00 |
| 170 | 130.62 | 56.78 | 76.00 | 57.00  | 56.00 | 132.00 |
| 171 | 126.82 | 60.53 | 76.00 | 57.00  | 79.00 | 50.00  |
| 172 | 128.20 | 59.27 | 76.00 | 57.00  | 60.00 | 137.00 |
| 173 | 134.74 | 51.48 | 76.00 | 57.00  | 89.00 | 41.00  |
| 174 | 142.66 | 35.75 | 76.00 | 57.00  | 83.00 | 51.00  |
| 175 | 143.65 | 38.00 | 37.00 | 138.00 | 87.00 | 50.00  |
| 176 | 87.75  | 23.47 | 37.00 | 138.00 | 29.00 | 123.00 |
| 177 | 78.18  | 17.74 | 37.00 | 138.00 | 31.00 | 130.00 |
| 178 | 152.36 | 37.70 | 37.00 | 138.00 | 79.00 | 65.00  |
| 179 | 221.89 | 9.31  | 37.00 | 138.00 | 56.00 | 132.00 |
| 180 | 137.14 | 37.80 | 37.00 | 138.00 | 79.00 | 50.00  |
| 181 | 173.60 | 34.19 | 37.00 | 138.00 | 66.00 | 241.00 |
| 182 | 177.24 | 33.16 | 37.00 | 138.00 | 60.00 | 240.00 |
| 183 | 173.39 | 34.24 | 37.00 | 138.00 | 63.00 | 238.00 |
| 184 | 188.12 | 29.29 | 37.00 | 138.00 | 45.00 | 238.00 |
| 185 | 161.84 | 36.64 | 37.00 | 138.00 | 71.00 | 231.00 |
| 186 | 166.72 | 35.78 | 37.00 | 138.00 | 66.00 | 232.00 |
| 187 | 218.62 | 11.71 | 37.00 | 138.00 | 87.00 | 303.00 |

|     |        |       |       |        |       |        |
|-----|--------|-------|-------|--------|-------|--------|
| 188 | 175.72 | 33.61 | 37.00 | 138.00 | 73.00 | 248.00 |
| 189 | 214.88 | 14.35 | 37.00 | 138.00 | 77.00 | 122.00 |
| 190 | 103.18 | 30.59 | 37.00 | 138.00 | 87.00 | 186.00 |
| 191 | 163.21 | 36.42 | 37.00 | 138.00 | 74.00 | 236.00 |
| 192 | 160.94 | 36.77 | 37.00 | 138.00 | 77.00 | 236.00 |
| 193 | 154.54 | 37.53 | 37.00 | 138.00 | 88.00 | 237.00 |
| 194 | 156.16 | 37.37 | 37.00 | 138.00 | 77.00 | 230.00 |
| 195 | 159.63 | 36.96 | 37.00 | 138.00 | 67.00 | 225.00 |
| 196 | 168.19 | 35.48 | 37.00 | 138.00 | 54.00 | 222.00 |
| 197 | 209.65 | 17.86 | 37.00 | 138.00 | 23.00 | 160.00 |
| 198 | 161.35 | 36.71 | 37.00 | 138.00 | 73.00 | 233.00 |
| 199 | 221.84 | 9.35  | 37.00 | 138.00 | 89.00 | 126.00 |
| 200 | 78.10  | 17.70 | 37.00 | 138.00 | 18.00 | 83.00  |
| 201 | 135.23 | 37.67 | 37.00 | 138.00 | 89.00 | 41.00  |
| 202 | 142.29 | 37.99 | 37.00 | 138.00 | 83.00 | 51.00  |
| 203 | 144.21 | 30.74 | 87.00 | 50.00  | 31.00 | 130.00 |
| 204 | 140.61 | 60.84 | 87.00 | 50.00  | 79.00 | 65.00  |
| 205 | 141.38 | 56.95 | 87.00 | 50.00  | 56.00 | 132.00 |
| 206 | 140.79 | 59.99 | 87.00 | 50.00  | 60.00 | 137.00 |
| 207 | 57.39  | 10.32 | 71.00 | 138.00 | 29.00 | 123.00 |
| 208 | 55.93  | 5.92  | 71.00 | 138.00 | 31.00 | 130.00 |
| 209 | 59.94  | 17.67 | 71.00 | 138.00 | 56.00 | 132.00 |
| 210 | 116.29 | 69.85 | 71.00 | 138.00 | 79.00 | 50.00  |
| 211 | 106.92 | 67.84 | 71.00 | 138.00 | 87.00 | 186.00 |
| 212 | 104.56 | 67.18 | 71.00 | 138.00 | 74.00 | 149.00 |
| 213 | 56.57  | 7.86  | 71.00 | 138.00 | 60.00 | 137.00 |
| 214 | 114.43 | 29.20 | 29.00 | 123.00 | 31.00 | 130.00 |
| 215 | 53.32  | 8.13  | 29.00 | 123.00 | 56.00 | 132.00 |
| 216 | 57.61  | 10.44 | 29.00 | 123.00 | 62.00 | 327.00 |
| 217 | 103.04 | 27.43 | 29.00 | 123.00 | 87.00 | 186.00 |
| 218 | 50.96  | 6.82  | 29.00 | 123.00 | 82.00 | 134.00 |
| 219 | 69.50  | 16.33 | 29.00 | 123.00 | 74.00 | 149.00 |
| 220 | 58.34  | 10.82 | 29.00 | 123.00 | 60.00 | 137.00 |
| 221 | 71.45  | 17.21 | 29.00 | 123.00 | 18.00 | 83.00  |
| 222 | 154.65 | 29.65 | 31.00 | 130.00 | 79.00 | 65.00  |
| 223 | 49.28  | 1.97  | 31.00 | 130.00 | 56.00 | 132.00 |
| 224 | 138.93 | 30.97 | 31.00 | 130.00 | 79.00 | 50.00  |
| 225 | 168.97 | 26.75 | 31.00 | 130.00 | 66.00 | 241.00 |
| 226 | 171.69 | 26.01 | 31.00 | 130.00 | 60.00 | 240.00 |
| 227 | 168.34 | 26.92 | 31.00 | 130.00 | 63.00 | 238.00 |
| 228 | 59.04  | 7.72  | 31.00 | 130.00 | 62.00 | 327.00 |
| 229 | 179.73 | 23.47 | 31.00 | 130.00 | 45.00 | 238.00 |
| 230 | 224.04 | 1.18  | 31.00 | 130.00 | 88.00 | 309.00 |
| 231 | 46.00  | 0.00  | 31.00 | 130.00 | 75.00 | 310.00 |
| 232 | 158.06 | 29.11 | 31.00 | 130.00 | 71.00 | 231.00 |
| 233 | 161.92 | 28.39 | 31.00 | 130.00 | 66.00 | 232.00 |
| 234 | 218.24 | 4.64  | 31.00 | 130.00 | 87.00 | 303.00 |
| 235 | 172.49 | 25.78 | 31.00 | 130.00 | 73.00 | 248.00 |
| 236 | 216.83 | 5.47  | 31.00 | 130.00 | 77.00 | 122.00 |
| 237 | 103.01 | 26.75 | 31.00 | 130.00 | 87.00 | 186.00 |
| 238 | 223.17 | 1.70  | 31.00 | 130.00 | 4.00  | 147.00 |
| 239 | 49.68  | 2.21  | 31.00 | 130.00 | 7.00  | 332.00 |
| 240 | 160.05 | 28.75 | 31.00 | 130.00 | 74.00 | 236.00 |
| 241 | 158.37 | 29.06 | 31.00 | 130.00 | 77.00 | 236.00 |
| 242 | 154.14 | 29.73 | 31.00 | 130.00 | 88.00 | 237.00 |
| 243 | 50.37  | 2.62  | 31.00 | 130.00 | 82.00 | 134.00 |
| 244 | 68.54  | 12.97 | 31.00 | 130.00 | 74.00 | 149.00 |
| 245 | 153.60 | 29.80 | 31.00 | 130.00 | 77.00 | 230.00 |
| 246 | 55.17  | 5.47  | 31.00 | 130.00 | 60.00 | 137.00 |
| 247 | 154.96 | 29.61 | 31.00 | 130.00 | 67.00 | 225.00 |
| 248 | 160.42 | 28.68 | 31.00 | 130.00 | 54.00 | 222.00 |
| 249 | 180.04 | 23.36 | 31.00 | 130.00 | 23.00 | 160.00 |
| 250 | 158.18 | 29.09 | 31.00 | 130.00 | 73.00 | 233.00 |
| 251 | 221.96 | 2.43  | 31.00 | 130.00 | 89.00 | 126.00 |

|     |        |       |       |        |       |        |
|-----|--------|-------|-------|--------|-------|--------|
| 252 | 78.07  | 17.69 | 31.00 | 130.00 | 18.00 | 83.00  |
| 253 | 135.40 | 31.00 | 31.00 | 130.00 | 89.00 | 41.00  |
| 254 | 143.41 | 30.79 | 31.00 | 130.00 | 83.00 | 51.00  |
| 255 | 143.67 | 56.87 | 79.00 | 65.00  | 56.00 | 132.00 |
| 256 | 154.22 | 31.29 | 79.00 | 65.00  | 88.00 | 237.00 |
| 257 | 154.15 | 31.54 | 79.00 | 65.00  | 77.00 | 230.00 |
| 258 | 141.33 | 60.00 | 79.00 | 65.00  | 60.00 | 137.00 |
| 259 | 133.63 | 67.08 | 79.00 | 65.00  | 89.00 | 41.00  |
| 260 | 131.61 | 68.39 | 79.00 | 65.00  | 83.00 | 51.00  |
| 261 | 129.43 | 56.71 | 56.00 | 132.00 | 79.00 | 50.00  |
| 262 | 184.28 | 46.78 | 56.00 | 132.00 | 66.00 | 241.00 |
| 263 | 188.71 | 44.28 | 56.00 | 132.00 | 60.00 | 240.00 |
| 264 | 184.88 | 46.46 | 56.00 | 132.00 | 63.00 | 238.00 |
| 265 | 56.41  | 12.69 | 56.00 | 132.00 | 62.00 | 327.00 |
| 266 | 200.10 | 35.77 | 56.00 | 132.00 | 45.00 | 238.00 |
| 267 | 172.81 | 51.66 | 56.00 | 132.00 | 71.00 | 231.00 |
| 268 | 179.10 | 49.24 | 56.00 | 132.00 | 66.00 | 232.00 |
| 269 | 218.74 | 13.91 | 56.00 | 132.00 | 87.00 | 303.00 |
| 270 | 183.33 | 47.27 | 56.00 | 132.00 | 73.00 | 248.00 |
| 271 | 213.21 | 21.46 | 56.00 | 132.00 | 77.00 | 122.00 |
| 272 | 104.57 | 52.11 | 56.00 | 132.00 | 87.00 | 186.00 |
| 273 | 49.45  | 2.24  | 56.00 | 132.00 | 7.00  | 332.00 |
| 274 | 172.37 | 51.80 | 56.00 | 132.00 | 74.00 | 236.00 |
| 275 | 168.78 | 52.91 | 56.00 | 132.00 | 77.00 | 236.00 |
| 276 | 155.93 | 55.68 | 56.00 | 132.00 | 88.00 | 237.00 |
| 277 | 50.55  | 3.92  | 56.00 | 132.00 | 82.00 | 134.00 |
| 278 | 76.27  | 36.10 | 56.00 | 132.00 | 74.00 | 149.00 |
| 279 | 164.54 | 54.02 | 56.00 | 132.00 | 77.00 | 230.00 |
| 280 | 80.73  | 39.78 | 56.00 | 132.00 | 60.00 | 137.00 |
| 281 | 173.26 | 51.50 | 56.00 | 132.00 | 67.00 | 225.00 |
| 282 | 185.76 | 45.99 | 56.00 | 132.00 | 54.00 | 222.00 |
| 283 | 217.67 | 15.44 | 56.00 | 132.00 | 23.00 | 160.00 |
| 284 | 170.79 | 52.31 | 56.00 | 132.00 | 73.00 | 233.00 |
| 285 | 221.83 | 9.39  | 56.00 | 132.00 | 89.00 | 126.00 |
| 286 | 58.47  | 15.64 | 56.00 | 132.00 | 18.00 | 83.00  |
| 287 | 134.46 | 56.95 | 56.00 | 132.00 | 89.00 | 41.00  |
| 288 | 137.69 | 57.00 | 56.00 | 132.00 | 83.00 | 51.00  |
| 289 | 127.78 | 59.22 | 79.00 | 50.00  | 60.00 | 137.00 |
| 290 | 135.02 | 44.51 | 79.00 | 50.00  | 89.00 | 41.00  |
| 291 | 175.96 | 37.48 | 66.00 | 241.00 | 63.00 | 238.00 |
| 292 | 180.63 | 43.11 | 66.00 | 241.00 | 73.00 | 248.00 |
| 293 | 188.24 | 50.15 | 66.00 | 241.00 | 60.00 | 137.00 |
| 294 | 181.38 | 43.91 | 66.00 | 241.00 | 54.00 | 222.00 |
| 295 | 193.09 | 47.41 | 60.00 | 240.00 | 60.00 | 137.00 |
| 296 | 197.72 | 50.21 | 60.00 | 240.00 | 54.00 | 222.00 |
| 297 | 179.88 | 41.82 | 63.00 | 238.00 | 73.00 | 248.00 |
| 298 | 189.10 | 49.70 | 63.00 | 238.00 | 60.00 | 137.00 |
| 299 | 182.73 | 44.58 | 63.00 | 238.00 | 54.00 | 222.00 |
| 300 | 57.84  | 10.00 | 62.00 | 327.00 | 60.00 | 137.00 |
| 301 | 208.09 | 39.00 | 45.00 | 238.00 | 77.00 | 122.00 |
| 302 | 205.24 | 37.95 | 45.00 | 238.00 | 60.00 | 137.00 |
| 303 | 169.94 | 48.55 | 71.00 | 231.00 | 74.00 | 236.00 |
| 304 | 159.04 | 31.21 | 71.00 | 231.00 | 77.00 | 236.00 |
| 305 | 176.46 | 55.00 | 71.00 | 231.00 | 60.00 | 137.00 |
| 306 | 170.69 | 49.40 | 71.00 | 231.00 | 67.00 | 225.00 |
| 307 | 158.83 | 30.77 | 71.00 | 231.00 | 73.00 | 233.00 |
| 308 | 183.36 | 52.43 | 66.00 | 232.00 | 60.00 | 137.00 |
| 309 | 164.35 | 32.31 | 66.00 | 232.00 | 54.00 | 222.00 |
| 310 | 186.28 | 51.12 | 73.00 | 248.00 | 60.00 | 137.00 |
| 311 | 180.99 | 43.71 | 73.00 | 248.00 | 54.00 | 222.00 |
| 312 | 210.11 | 32.85 | 77.00 | 122.00 | 60.00 | 137.00 |
| 313 | 107.00 | 68.18 | 87.00 | 186.00 | 74.00 | 149.00 |
| 314 | 104.76 | 54.05 | 87.00 | 186.00 | 60.00 | 137.00 |
| 315 | 175.47 | 55.31 | 74.00 | 236.00 | 60.00 | 137.00 |

|     |        |       |       |        |       |        |
|-----|--------|-------|-------|--------|-------|--------|
| 316 | 170.31 | 49.07 | 74.00 | 236.00 | 67.00 | 225.00 |
| 317 | 171.39 | 56.47 | 77.00 | 236.00 | 60.00 | 137.00 |
| 318 | 162.50 | 40.80 | 77.00 | 236.00 | 67.00 | 225.00 |
| 319 | 159.18 | 31.66 | 77.00 | 236.00 | 73.00 | 233.00 |
| 320 | 154.24 | 31.84 | 88.00 | 237.00 | 77.00 | 230.00 |
| 321 | 156.36 | 59.21 | 88.00 | 237.00 | 60.00 | 137.00 |
| 322 | 75.79  | 34.94 | 74.00 | 149.00 | 60.00 | 137.00 |
| 323 | 167.21 | 57.46 | 77.00 | 230.00 | 60.00 | 137.00 |
| 324 | 177.67 | 54.60 | 60.00 | 137.00 | 67.00 | 225.00 |
| 325 | 191.62 | 48.29 | 60.00 | 137.00 | 54.00 | 222.00 |
| 326 | 173.93 | 55.77 | 60.00 | 137.00 | 73.00 | 233.00 |
| 327 | 61.59  | 16.09 | 60.00 | 137.00 | 18.00 | 83.00  |
| 328 | 134.28 | 59.77 | 60.00 | 137.00 | 89.00 | 41.00  |
| 329 | 136.56 | 59.89 | 60.00 | 137.00 | 83.00 | 51.00  |
| 330 | 164.85 | 43.61 | 67.00 | 225.00 | 73.00 | 233.00 |
| 331 | 133.83 | 65.23 | 89.00 | 41.00  | 83.00 | 51.00  |
| 332 | 283.07 | 53.55 | 66.00 | 330.00 | 87.00 | 3.00   |
| 333 | 274.58 | 47.06 | 66.00 | 330.00 | 83.00 | 351.00 |
| 334 | 269.17 | 41.47 | 66.00 | 330.00 | 77.00 | 184.00 |
| 335 | 266.01 | 37.54 | 66.00 | 330.00 | 81.00 | 177.00 |
| 336 | 284.77 | 54.59 | 66.00 | 330.00 | 60.00 | 240.00 |
| 337 | 287.48 | 56.09 | 66.00 | 330.00 | 63.00 | 238.00 |
| 338 | 265.75 | 37.19 | 66.00 | 330.00 | 62.00 | 327.00 |
| 339 | 269.66 | 42.03 | 66.00 | 330.00 | 45.00 | 238.00 |
| 340 | 287.00 | 55.84 | 66.00 | 330.00 | 66.00 | 232.00 |
| 341 | 279.52 | 51.12 | 66.00 | 330.00 | 87.00 | 186.00 |
| 342 | 284.55 | 54.46 | 66.00 | 330.00 | 67.00 | 225.00 |
| 343 | 271.78 | 44.33 | 66.00 | 330.00 | 54.00 | 222.00 |
| 344 | 161.59 | 12.33 | 19.00 | 105.00 | 66.00 | 241.00 |
| 345 | 160.29 | 12.66 | 19.00 | 105.00 | 63.00 | 238.00 |
| 346 | 154.40 | 14.05 | 19.00 | 105.00 | 66.00 | 232.00 |
| 347 | 147.73 | 15.43 | 19.00 | 105.00 | 67.00 | 225.00 |
| 348 | 148.45 | 15.29 | 19.00 | 105.00 | 54.00 | 222.00 |
| 349 | 153.04 | 11.16 | 19.00 | 92.00  | 66.00 | 232.00 |
| 350 | 146.55 | 12.84 | 19.00 | 92.00  | 67.00 | 225.00 |
| 351 | 146.54 | 12.84 | 19.00 | 92.00  | 54.00 | 222.00 |
| 352 | 283.31 | 55.13 | 87.00 | 3.00   | 60.00 | 240.00 |
| 353 | 283.74 | 57.61 | 87.00 | 3.00   | 63.00 | 238.00 |
| 354 | 282.77 | 51.46 | 87.00 | 3.00   | 62.00 | 327.00 |
| 355 | 281.39 | 38.47 | 87.00 | 3.00   | 45.00 | 238.00 |
| 356 | 283.71 | 57.48 | 87.00 | 3.00   | 66.00 | 232.00 |
| 357 | 280.80 | 30.94 | 87.00 | 3.00   | 87.00 | 186.00 |
| 358 | 283.33 | 55.22 | 87.00 | 3.00   | 67.00 | 225.00 |
| 359 | 281.41 | 38.70 | 87.00 | 3.00   | 54.00 | 222.00 |
| 360 | 271.75 | 34.01 | 83.00 | 351.00 | 77.00 | 184.00 |
| 361 | 280.19 | 61.71 | 83.00 | 351.00 | 66.00 | 241.00 |
| 362 | 277.85 | 56.87 | 83.00 | 351.00 | 60.00 | 240.00 |
| 363 | 278.91 | 59.26 | 83.00 | 351.00 | 63.00 | 238.00 |
| 364 | 274.16 | 45.44 | 83.00 | 351.00 | 62.00 | 327.00 |
| 365 | 273.16 | 41.13 | 83.00 | 351.00 | 45.00 | 238.00 |
| 366 | 279.01 | 59.46 | 83.00 | 351.00 | 66.00 | 232.00 |
| 367 | 278.70 | 58.80 | 83.00 | 351.00 | 87.00 | 186.00 |
| 368 | 278.31 | 57.95 | 83.00 | 351.00 | 67.00 | 225.00 |
| 369 | 273.66 | 43.37 | 83.00 | 351.00 | 54.00 | 222.00 |
| 370 | 297.59 | 30.69 | 89.00 | 21.00  | 45.00 | 238.00 |
| 371 | 297.92 | 42.72 | 89.00 | 21.00  | 67.00 | 225.00 |
| 372 | 297.46 | 24.72 | 89.00 | 21.00  | 54.00 | 222.00 |
| 373 | 313.12 | 17.91 | 57.00 | 25.00  | 67.00 | 225.00 |
| 374 | 308.55 | 11.44 | 57.00 | 25.00  | 54.00 | 222.00 |
| 375 | 258.54 | 59.84 | 79.00 | 323.00 | 77.00 | 184.00 |
| 376 | 257.79 | 58.89 | 79.00 | 323.00 | 81.00 | 177.00 |
| 377 | 263.59 | 64.96 | 79.00 | 323.00 | 66.00 | 241.00 |
| 378 | 258.98 | 60.37 | 79.00 | 323.00 | 60.00 | 240.00 |
| 379 | 261.36 | 62.93 | 79.00 | 323.00 | 63.00 | 238.00 |

|     |        |       |       |        |       |        |
|-----|--------|-------|-------|--------|-------|--------|
| 380 | 250.14 | 44.84 | 79.00 | 323.00 | 45.00 | 238.00 |
| 381 | 262.42 | 63.94 | 79.00 | 323.00 | 66.00 | 232.00 |
| 382 | 262.09 | 63.63 | 79.00 | 323.00 | 67.00 | 225.00 |
| 383 | 252.92 | 51.07 | 79.00 | 323.00 | 54.00 | 222.00 |
| 384 | 142.00 | 2.35  | 66.00 | 47.00  | 67.00 | 225.00 |
| 385 | 142.71 | 4.02  | 29.00 | 55.00  | 67.00 | 225.00 |
| 386 | 191.34 | 64.38 | 84.00 | 108.00 | 71.00 | 138.00 |
| 387 | 199.58 | 36.23 | 84.00 | 108.00 | 56.00 | 132.00 |
| 388 | 195.39 | 54.94 | 84.00 | 108.00 | 66.00 | 241.00 |
| 389 | 196.87 | 49.73 | 84.00 | 108.00 | 60.00 | 240.00 |
| 390 | 195.75 | 53.78 | 84.00 | 108.00 | 63.00 | 238.00 |
| 391 | 199.69 | 35.59 | 84.00 | 108.00 | 45.00 | 238.00 |
| 392 | 191.62 | 63.89 | 84.00 | 108.00 | 71.00 | 231.00 |
| 393 | 194.19 | 58.33 | 84.00 | 108.00 | 66.00 | 232.00 |
| 394 | 194.08 | 58.62 | 84.00 | 108.00 | 73.00 | 248.00 |
| 395 | 191.05 | 64.87 | 84.00 | 108.00 | 77.00 | 122.00 |
| 396 | 190.51 | 65.74 | 84.00 | 108.00 | 74.00 | 236.00 |
| 397 | 198.19 | 43.95 | 84.00 | 108.00 | 60.00 | 137.00 |
| 398 | 192.78 | 61.62 | 84.00 | 108.00 | 67.00 | 225.00 |
| 399 | 196.82 | 49.95 | 84.00 | 108.00 | 54.00 | 222.00 |
| 400 | 253.78 | 64.31 | 77.00 | 184.00 | 81.00 | 177.00 |
| 401 | 251.63 | 65.90 | 77.00 | 184.00 | 66.00 | 241.00 |
| 402 | 257.97 | 60.46 | 77.00 | 184.00 | 60.00 | 240.00 |
| 403 | 254.64 | 63.61 | 77.00 | 184.00 | 63.00 | 238.00 |
| 404 | 269.34 | 41.04 | 77.00 | 184.00 | 62.00 | 327.00 |
| 405 | 268.88 | 42.21 | 77.00 | 184.00 | 45.00 | 238.00 |
| 406 | 256.36 | 62.07 | 77.00 | 184.00 | 75.00 | 310.00 |
| 407 | 252.47 | 65.31 | 77.00 | 184.00 | 66.00 | 232.00 |
| 408 | 252.16 | 65.53 | 77.00 | 184.00 | 67.00 | 225.00 |
| 409 | 267.06 | 46.49 | 77.00 | 184.00 | 54.00 | 222.00 |
| 410 | 252.29 | 65.87 | 81.00 | 177.00 | 66.00 | 241.00 |
| 411 | 256.69 | 60.57 | 81.00 | 177.00 | 60.00 | 240.00 |
| 412 | 254.37 | 63.63 | 81.00 | 177.00 | 63.00 | 238.00 |
| 413 | 266.02 | 37.50 | 81.00 | 177.00 | 62.00 | 327.00 |
| 414 | 264.47 | 43.13 | 81.00 | 177.00 | 45.00 | 238.00 |
| 415 | 255.88 | 61.72 | 81.00 | 177.00 | 75.00 | 310.00 |
| 416 | 252.89 | 65.26 | 81.00 | 177.00 | 66.00 | 232.00 |
| 417 | 252.72 | 65.44 | 81.00 | 177.00 | 67.00 | 225.00 |
| 418 | 262.82 | 48.14 | 81.00 | 177.00 | 54.00 | 222.00 |
| 419 | 151.73 | 8.31  | 29.00 | 71.00  | 66.00 | 232.00 |
| 420 | 145.87 | 11.30 | 29.00 | 71.00  | 67.00 | 225.00 |
| 421 | 145.49 | 11.49 | 29.00 | 71.00  | 54.00 | 222.00 |
| 422 | 192.66 | 63.81 | 84.00 | 109.00 | 71.00 | 138.00 |
| 423 | 200.75 | 35.19 | 84.00 | 109.00 | 56.00 | 132.00 |
| 424 | 196.23 | 55.42 | 84.00 | 109.00 | 66.00 | 241.00 |
| 425 | 197.75 | 50.22 | 84.00 | 109.00 | 60.00 | 240.00 |
| 426 | 196.61 | 54.23 | 84.00 | 109.00 | 63.00 | 238.00 |
| 427 | 200.62 | 36.01 | 84.00 | 109.00 | 45.00 | 238.00 |
| 428 | 192.44 | 64.21 | 84.00 | 109.00 | 71.00 | 231.00 |
| 429 | 195.05 | 58.69 | 84.00 | 109.00 | 66.00 | 232.00 |
| 430 | 194.85 | 59.19 | 84.00 | 109.00 | 73.00 | 248.00 |
| 431 | 192.89 | 63.40 | 84.00 | 109.00 | 77.00 | 122.00 |
| 432 | 191.29 | 66.09 | 84.00 | 109.00 | 74.00 | 236.00 |
| 433 | 199.37 | 43.05 | 84.00 | 109.00 | 60.00 | 137.00 |
| 434 | 193.65 | 61.90 | 84.00 | 109.00 | 67.00 | 225.00 |
| 435 | 197.75 | 50.21 | 84.00 | 109.00 | 54.00 | 222.00 |
| 436 | 151.22 | 7.20  | 69.00 | 58.00  | 66.00 | 232.00 |
| 437 | 147.83 | 15.65 | 69.00 | 58.00  | 67.00 | 225.00 |
| 438 | 148.14 | 14.89 | 69.00 | 58.00  | 54.00 | 222.00 |
| 439 | 153.69 | 33.21 | 36.00 | 123.00 | 79.00 | 65.00  |
| 440 | 169.93 | 28.39 | 36.00 | 123.00 | 66.00 | 241.00 |
| 441 | 172.65 | 27.33 | 36.00 | 123.00 | 60.00 | 240.00 |
| 442 | 169.41 | 28.59 | 36.00 | 123.00 | 63.00 | 238.00 |
| 443 | 180.35 | 23.93 | 36.00 | 123.00 | 45.00 | 238.00 |

|     |        |       |       |        |       |        |
|-----|--------|-------|-------|--------|-------|--------|
| 444 | 159.34 | 31.82 | 36.00 | 123.00 | 71.00 | 231.00 |
| 445 | 163.31 | 30.66 | 36.00 | 123.00 | 66.00 | 232.00 |
| 446 | 161.06 | 31.34 | 36.00 | 123.00 | 74.00 | 236.00 |
| 447 | 159.25 | 31.85 | 36.00 | 123.00 | 77.00 | 236.00 |
| 448 | 154.30 | 33.08 | 36.00 | 123.00 | 88.00 | 237.00 |
| 449 | 154.62 | 33.00 | 36.00 | 123.00 | 77.00 | 230.00 |
| 450 | 156.70 | 32.51 | 36.00 | 123.00 | 67.00 | 225.00 |
| 451 | 162.72 | 30.85 | 36.00 | 123.00 | 54.00 | 222.00 |
| 452 | 159.26 | 31.84 | 36.00 | 123.00 | 73.00 | 233.00 |
| 453 | 151.21 | 7.16  | 76.00 | 57.00  | 66.00 | 232.00 |
| 454 | 148.56 | 17.23 | 76.00 | 57.00  | 67.00 | 225.00 |
| 455 | 148.93 | 15.88 | 76.00 | 57.00  | 54.00 | 222.00 |
| 456 | 173.60 | 34.19 | 37.00 | 138.00 | 66.00 | 241.00 |
| 457 | 177.24 | 33.16 | 37.00 | 138.00 | 60.00 | 240.00 |
| 458 | 173.39 | 34.24 | 37.00 | 138.00 | 63.00 | 238.00 |
| 459 | 188.12 | 29.29 | 37.00 | 138.00 | 45.00 | 238.00 |
| 460 | 161.84 | 36.64 | 37.00 | 138.00 | 71.00 | 231.00 |
| 461 | 166.72 | 35.78 | 37.00 | 138.00 | 66.00 | 232.00 |
| 462 | 175.72 | 33.61 | 37.00 | 138.00 | 73.00 | 248.00 |
| 463 | 163.21 | 36.42 | 37.00 | 138.00 | 74.00 | 236.00 |
| 464 | 160.94 | 36.77 | 37.00 | 138.00 | 77.00 | 236.00 |
| 465 | 156.16 | 37.37 | 37.00 | 138.00 | 77.00 | 230.00 |
| 466 | 159.63 | 36.96 | 37.00 | 138.00 | 67.00 | 225.00 |
| 467 | 168.19 | 35.48 | 37.00 | 138.00 | 54.00 | 222.00 |
| 468 | 161.35 | 36.71 | 37.00 | 138.00 | 73.00 | 233.00 |
| 469 | 145.45 | 10.36 | 87.00 | 50.00  | 67.00 | 225.00 |
| 470 | 145.40 | 11.36 | 87.00 | 50.00  | 54.00 | 222.00 |
| 471 | 202.21 | 58.34 | 71.00 | 138.00 | 66.00 | 241.00 |
| 472 | 206.93 | 54.47 | 71.00 | 138.00 | 60.00 | 240.00 |
| 473 | 203.54 | 57.34 | 71.00 | 138.00 | 63.00 | 238.00 |
| 474 | 217.15 | 41.74 | 71.00 | 138.00 | 45.00 | 238.00 |
| 475 | 192.08 | 64.07 | 71.00 | 138.00 | 71.00 | 231.00 |
| 476 | 199.29 | 60.29 | 71.00 | 138.00 | 66.00 | 232.00 |
| 477 | 220.20 | 36.28 | 71.00 | 138.00 | 87.00 | 303.00 |
| 478 | 197.78 | 61.19 | 71.00 | 138.00 | 73.00 | 248.00 |
| 479 | 192.09 | 64.06 | 71.00 | 138.00 | 77.00 | 122.00 |
| 480 | 189.34 | 65.19 | 71.00 | 138.00 | 74.00 | 236.00 |
| 481 | 195.47 | 62.45 | 71.00 | 138.00 | 67.00 | 225.00 |
| 482 | 208.85 | 52.60 | 71.00 | 138.00 | 54.00 | 222.00 |
| 483 | 221.32 | 34.03 | 71.00 | 138.00 | 89.00 | 126.00 |
| 484 | 167.59 | 24.29 | 29.00 | 123.00 | 66.00 | 241.00 |
| 485 | 169.98 | 23.55 | 29.00 | 123.00 | 60.00 | 240.00 |
| 486 | 166.85 | 24.51 | 29.00 | 123.00 | 63.00 | 238.00 |
| 487 | 176.81 | 21.19 | 29.00 | 123.00 | 45.00 | 238.00 |
| 488 | 160.64 | 26.18 | 29.00 | 123.00 | 66.00 | 232.00 |
| 489 | 153.85 | 27.65 | 29.00 | 123.00 | 67.00 | 225.00 |
| 490 | 158.43 | 26.70 | 29.00 | 123.00 | 54.00 | 222.00 |
| 491 | 168.97 | 26.75 | 31.00 | 130.00 | 66.00 | 241.00 |
| 492 | 171.69 | 26.01 | 31.00 | 130.00 | 60.00 | 240.00 |
| 493 | 168.34 | 26.92 | 31.00 | 130.00 | 63.00 | 238.00 |
| 494 | 179.73 | 23.47 | 31.00 | 130.00 | 45.00 | 238.00 |
| 495 | 161.92 | 28.39 | 31.00 | 130.00 | 66.00 | 232.00 |
| 496 | 154.96 | 29.61 | 31.00 | 130.00 | 67.00 | 225.00 |
| 497 | 160.42 | 28.68 | 31.00 | 130.00 | 54.00 | 222.00 |
| 498 | 157.06 | 19.47 | 79.00 | 65.00  | 66.00 | 232.00 |
| 499 | 154.22 | 31.29 | 79.00 | 65.00  | 88.00 | 237.00 |
| 500 | 154.15 | 31.54 | 79.00 | 65.00  | 77.00 | 230.00 |
| 501 | 154.75 | 29.25 | 79.00 | 65.00  | 67.00 | 225.00 |
| 502 | 156.00 | 24.14 | 79.00 | 65.00  | 54.00 | 222.00 |
| 503 | 184.28 | 46.78 | 56.00 | 132.00 | 66.00 | 241.00 |
| 504 | 188.71 | 44.28 | 56.00 | 132.00 | 60.00 | 240.00 |
| 505 | 184.88 | 46.46 | 56.00 | 132.00 | 63.00 | 238.00 |
| 506 | 200.10 | 35.77 | 56.00 | 132.00 | 45.00 | 238.00 |
| 507 | 172.81 | 51.66 | 56.00 | 132.00 | 71.00 | 231.00 |



|     |        |       |       |        |       |        |
|-----|--------|-------|-------|--------|-------|--------|
| 508 | 179.10 | 49.24 | 56.00 | 132.00 | 66.00 | 232.00 |
| 509 | 183.33 | 47.27 | 56.00 | 132.00 | 73.00 | 248.00 |
| 510 | 172.37 | 51.80 | 56.00 | 132.00 | 74.00 | 236.00 |
| 511 | 168.78 | 52.91 | 56.00 | 132.00 | 77.00 | 236.00 |
| 512 | 173.26 | 51.50 | 56.00 | 132.00 | 67.00 | 225.00 |
| 513 | 185.76 | 45.99 | 56.00 | 132.00 | 54.00 | 222.00 |
| 514 | 170.79 | 52.31 | 56.00 | 132.00 | 73.00 | 233.00 |
| 515 | 143.83 | 6.63  | 79.00 | 50.00  | 67.00 | 225.00 |
| 516 | 143.44 | 8.78  | 79.00 | 50.00  | 54.00 | 222.00 |
| 517 | 175.96 | 37.48 | 66.00 | 241.00 | 63.00 | 238.00 |
| 518 | 228.28 | 64.95 | 66.00 | 241.00 | 88.00 | 309.00 |
| 519 | 261.45 | 65.21 | 66.00 | 241.00 | 75.00 | 310.00 |
| 520 | 242.00 | 65.95 | 66.00 | 241.00 | 66.00 | 232.00 |
| 521 | 224.28 | 64.39 | 66.00 | 241.00 | 87.00 | 303.00 |
| 522 | 180.63 | 43.11 | 66.00 | 241.00 | 73.00 | 248.00 |
| 523 | 199.00 | 56.86 | 66.00 | 241.00 | 77.00 | 122.00 |
| 524 | 278.19 | 62.25 | 66.00 | 241.00 | 87.00 | 186.00 |
| 525 | 214.40 | 62.40 | 66.00 | 241.00 | 82.00 | 134.00 |
| 526 | 214.23 | 62.36 | 66.00 | 241.00 | 74.00 | 149.00 |
| 527 | 188.24 | 50.15 | 66.00 | 241.00 | 60.00 | 137.00 |
| 528 | 248.77 | 65.98 | 66.00 | 241.00 | 67.00 | 225.00 |
| 529 | 181.38 | 43.91 | 66.00 | 241.00 | 54.00 | 222.00 |
| 530 | 167.43 | 23.99 | 66.00 | 241.00 | 23.00 | 160.00 |
| 531 | 219.98 | 63.64 | 66.00 | 241.00 | 89.00 | 126.00 |
| 532 | 286.96 | 53.72 | 60.00 | 240.00 | 62.00 | 327.00 |
| 533 | 227.42 | 59.68 | 60.00 | 240.00 | 88.00 | 309.00 |
| 534 | 254.56 | 60.73 | 60.00 | 240.00 | 75.00 | 310.00 |
| 535 | 222.99 | 58.94 | 60.00 | 240.00 | 87.00 | 303.00 |
| 536 | 173.60 | 28.61 | 60.00 | 240.00 | 73.00 | 248.00 |
| 537 | 201.99 | 52.38 | 60.00 | 240.00 | 77.00 | 122.00 |
| 538 | 278.97 | 56.55 | 60.00 | 240.00 | 87.00 | 186.00 |
| 539 | 217.17 | 57.68 | 60.00 | 240.00 | 82.00 | 134.00 |
| 540 | 219.39 | 58.20 | 60.00 | 240.00 | 74.00 | 149.00 |
| 541 | 193.09 | 47.41 | 60.00 | 240.00 | 60.00 | 137.00 |
| 542 | 283.72 | 54.98 | 60.00 | 240.00 | 67.00 | 225.00 |
| 543 | 197.72 | 50.21 | 60.00 | 240.00 | 54.00 | 222.00 |
| 544 | 170.25 | 23.94 | 60.00 | 240.00 | 23.00 | 160.00 |
| 545 | 220.37 | 58.42 | 60.00 | 240.00 | 89.00 | 126.00 |
| 546 | 289.77 | 55.04 | 63.00 | 238.00 | 62.00 | 327.00 |
| 547 | 227.95 | 63.09 | 63.00 | 238.00 | 88.00 | 309.00 |
| 548 | 258.18 | 63.29 | 63.00 | 238.00 | 75.00 | 310.00 |
| 549 | 282.00 | 58.24 | 63.00 | 238.00 | 66.00 | 232.00 |
| 550 | 223.79 | 62.54 | 63.00 | 238.00 | 87.00 | 303.00 |
| 551 | 179.88 | 41.82 | 63.00 | 238.00 | 73.00 | 248.00 |
| 552 | 199.80 | 55.77 | 63.00 | 238.00 | 77.00 | 122.00 |
| 553 | 278.62 | 59.35 | 63.00 | 238.00 | 87.00 | 186.00 |
| 554 | 215.35 | 60.94 | 63.00 | 238.00 | 82.00 | 134.00 |
| 555 | 215.99 | 61.08 | 63.00 | 238.00 | 74.00 | 149.00 |
| 556 | 189.10 | 49.70 | 63.00 | 238.00 | 60.00 | 137.00 |
| 557 | 268.83 | 61.75 | 63.00 | 238.00 | 67.00 | 225.00 |
| 558 | 182.73 | 44.58 | 63.00 | 238.00 | 54.00 | 222.00 |
| 559 | 166.54 | 24.00 | 63.00 | 238.00 | 23.00 | 160.00 |
| 560 | 220.12 | 61.93 | 63.00 | 238.00 | 89.00 | 126.00 |
| 561 | 270.20 | 41.90 | 62.00 | 327.00 | 45.00 | 238.00 |
| 562 | 289.03 | 54.70 | 62.00 | 327.00 | 66.00 | 232.00 |
| 563 | 279.66 | 49.52 | 62.00 | 327.00 | 87.00 | 186.00 |
| 564 | 286.22 | 53.35 | 62.00 | 327.00 | 67.00 | 225.00 |
| 565 | 272.46 | 43.99 | 62.00 | 327.00 | 54.00 | 222.00 |
| 566 | 225.90 | 43.55 | 45.00 | 238.00 | 88.00 | 309.00 |
| 567 | 241.53 | 44.97 | 45.00 | 238.00 | 75.00 | 310.00 |
| 568 | 220.76 | 42.58 | 45.00 | 238.00 | 87.00 | 303.00 |
| 569 | 208.09 | 39.00 | 45.00 | 238.00 | 77.00 | 122.00 |
| 570 | 280.39 | 38.83 | 45.00 | 238.00 | 87.00 | 186.00 |
| 571 | 222.49 | 42.93 | 45.00 | 238.00 | 82.00 | 134.00 |

|     |        |       |       |        |       |        |
|-----|--------|-------|-------|--------|-------|--------|
| 572 | 229.93 | 44.13 | 45.00 | 238.00 | 74.00 | 149.00 |
| 573 | 205.24 | 37.95 | 45.00 | 238.00 | 60.00 | 137.00 |
| 574 | 311.75 | 20.74 | 45.00 | 238.00 | 67.00 | 225.00 |
| 575 | 282.16 | 38.18 | 45.00 | 238.00 | 54.00 | 222.00 |
| 576 | 179.64 | 23.40 | 45.00 | 238.00 | 23.00 | 160.00 |
| 577 | 221.08 | 42.65 | 45.00 | 238.00 | 89.00 | 126.00 |
| 578 | 229.77 | 70.86 | 88.00 | 309.00 | 71.00 | 231.00 |
| 579 | 228.44 | 65.70 | 88.00 | 309.00 | 66.00 | 232.00 |
| 580 | 225.19 | 30.81 | 88.00 | 309.00 | 82.00 | 134.00 |
| 581 | 226.38 | 49.99 | 88.00 | 309.00 | 74.00 | 149.00 |
| 582 | 228.72 | 66.98 | 88.00 | 309.00 | 67.00 | 225.00 |
| 583 | 226.75 | 54.00 | 88.00 | 309.00 | 54.00 | 222.00 |
| 584 | 259.94 | 64.36 | 75.00 | 310.00 | 66.00 | 232.00 |
| 585 | 235.50 | 31.63 | 75.00 | 310.00 | 74.00 | 149.00 |
| 586 | 259.64 | 64.19 | 75.00 | 310.00 | 67.00 | 225.00 |
| 587 | 246.36 | 52.40 | 75.00 | 310.00 | 54.00 | 222.00 |
| 588 | 226.61 | 70.71 | 71.00 | 231.00 | 87.00 | 303.00 |
| 589 | 223.83 | 70.53 | 71.00 | 231.00 | 73.00 | 248.00 |
| 590 | 192.08 | 64.07 | 71.00 | 231.00 | 77.00 | 122.00 |
| 591 | 169.94 | 48.55 | 71.00 | 231.00 | 74.00 | 236.00 |
| 592 | 159.04 | 31.21 | 71.00 | 231.00 | 77.00 | 236.00 |
| 593 | 208.90 | 68.68 | 71.00 | 231.00 | 82.00 | 134.00 |
| 594 | 204.17 | 67.72 | 71.00 | 231.00 | 74.00 | 149.00 |
| 595 | 176.46 | 55.00 | 71.00 | 231.00 | 60.00 | 137.00 |
| 596 | 170.69 | 49.40 | 71.00 | 231.00 | 67.00 | 225.00 |
| 597 | 155.77 | 23.89 | 71.00 | 231.00 | 54.00 | 222.00 |
| 598 | 158.83 | 30.77 | 71.00 | 231.00 | 73.00 | 233.00 |
| 599 | 219.23 | 70.12 | 71.00 | 231.00 | 89.00 | 126.00 |
| 600 | 224.57 | 65.40 | 66.00 | 232.00 | 87.00 | 303.00 |
| 601 | 193.11 | 57.85 | 66.00 | 232.00 | 73.00 | 248.00 |
| 602 | 196.91 | 59.43 | 66.00 | 232.00 | 77.00 | 122.00 |
| 603 | 278.59 | 59.62 | 66.00 | 232.00 | 87.00 | 186.00 |
| 604 | 156.40 | 18.16 | 66.00 | 232.00 | 74.00 | 236.00 |
| 605 | 154.22 | 13.68 | 66.00 | 232.00 | 77.00 | 236.00 |
| 606 | 153.42 | 11.99 | 66.00 | 232.00 | 88.00 | 237.00 |
| 607 | 213.33 | 63.90 | 66.00 | 232.00 | 82.00 | 134.00 |
| 608 | 212.19 | 63.69 | 66.00 | 232.00 | 74.00 | 149.00 |
| 609 | 183.36 | 52.43 | 66.00 | 232.00 | 60.00 | 137.00 |
| 610 | 255.81 | 64.94 | 66.00 | 232.00 | 67.00 | 225.00 |
| 611 | 164.35 | 32.31 | 66.00 | 232.00 | 54.00 | 222.00 |
| 612 | 159.36 | 23.86 | 66.00 | 232.00 | 23.00 | 160.00 |
| 613 | 150.81 | 6.28  | 66.00 | 232.00 | 73.00 | 233.00 |
| 614 | 219.86 | 64.90 | 66.00 | 232.00 | 89.00 | 126.00 |
| 615 | 151.79 | 8.45  | 66.00 | 232.00 | 18.00 | 83.00  |
| 616 | 221.25 | 47.26 | 87.00 | 303.00 | 82.00 | 134.00 |
| 617 | 222.32 | 55.20 | 87.00 | 303.00 | 74.00 | 149.00 |
| 618 | 225.05 | 66.89 | 87.00 | 303.00 | 67.00 | 225.00 |
| 619 | 222.12 | 53.90 | 87.00 | 303.00 | 54.00 | 222.00 |
| 620 | 221.00 | 44.97 | 87.00 | 303.00 | 89.00 | 126.00 |
| 621 | 196.23 | 60.18 | 73.00 | 248.00 | 77.00 | 122.00 |
| 622 | 210.52 | 67.15 | 73.00 | 248.00 | 82.00 | 134.00 |
| 623 | 207.72 | 66.14 | 73.00 | 248.00 | 74.00 | 149.00 |
| 624 | 186.28 | 51.12 | 73.00 | 248.00 | 60.00 | 137.00 |
| 625 | 203.86 | 64.50 | 73.00 | 248.00 | 67.00 | 225.00 |
| 626 | 180.99 | 43.71 | 73.00 | 248.00 | 54.00 | 222.00 |
| 627 | 219.31 | 69.60 | 73.00 | 248.00 | 89.00 | 126.00 |
| 628 | 190.12 | 65.56 | 77.00 | 122.00 | 74.00 | 236.00 |
| 629 | 210.11 | 32.85 | 77.00 | 122.00 | 60.00 | 137.00 |
| 630 | 194.32 | 62.11 | 77.00 | 122.00 | 67.00 | 225.00 |
| 631 | 202.55 | 51.41 | 77.00 | 122.00 | 54.00 | 222.00 |
| 632 | 278.83 | 57.69 | 87.00 | 186.00 | 67.00 | 225.00 |
| 633 | 280.36 | 39.40 | 87.00 | 186.00 | 54.00 | 222.00 |
| 634 | 143.10 | 4.93  | 4.00  | 147.00 | 67.00 | 225.00 |
| 635 | 312.39 | 6.32  | 7.00  | 332.00 | 54.00 | 222.00 |

---

|     |        |       |       |        |       |        |
|-----|--------|-------|-------|--------|-------|--------|
| 636 | 175.47 | 55.31 | 74.00 | 236.00 | 60.00 | 137.00 |
| 637 | 170.31 | 49.07 | 74.00 | 236.00 | 67.00 | 225.00 |
| 638 | 159.80 | 28.07 | 74.00 | 236.00 | 54.00 | 222.00 |
| 639 | 171.39 | 56.47 | 77.00 | 236.00 | 60.00 | 137.00 |
| 640 | 162.50 | 40.80 | 77.00 | 236.00 | 67.00 | 225.00 |
| 641 | 157.34 | 25.57 | 77.00 | 236.00 | 54.00 | 222.00 |
| 642 | 159.18 | 31.66 | 77.00 | 236.00 | 73.00 | 233.00 |
| 643 | 154.24 | 31.84 | 88.00 | 237.00 | 77.00 | 230.00 |
| 644 | 154.07 | 28.04 | 88.00 | 237.00 | 67.00 | 225.00 |
| 645 | 153.80 | 21.69 | 88.00 | 237.00 | 54.00 | 222.00 |
| 646 | 214.62 | 62.09 | 82.00 | 134.00 | 74.00 | 149.00 |
| 647 | 211.78 | 65.79 | 82.00 | 134.00 | 67.00 | 225.00 |
| 648 | 218.96 | 53.73 | 82.00 | 134.00 | 54.00 | 222.00 |
| 649 | 220.87 | 48.47 | 82.00 | 134.00 | 89.00 | 126.00 |
| 650 | 209.14 | 65.42 | 74.00 | 149.00 | 67.00 | 225.00 |
| 651 | 223.40 | 53.95 | 74.00 | 149.00 | 54.00 | 222.00 |
| 652 | 220.45 | 57.18 | 74.00 | 149.00 | 89.00 | 126.00 |
| 653 | 151.91 | 24.03 | 77.00 | 230.00 | 67.00 | 225.00 |
| 654 | 150.14 | 17.38 | 77.00 | 230.00 | 54.00 | 222.00 |
| 655 | 177.67 | 54.60 | 60.00 | 137.00 | 67.00 | 225.00 |
| 656 | 191.62 | 48.29 | 60.00 | 137.00 | 54.00 | 222.00 |
| 657 | 173.93 | 55.77 | 60.00 | 137.00 | 73.00 | 233.00 |
| 658 | 146.58 | 12.90 | 67.00 | 225.00 | 54.00 | 222.00 |
| 659 | 151.54 | 23.32 | 67.00 | 225.00 | 23.00 | 160.00 |
| 660 | 164.85 | 43.61 | 67.00 | 225.00 | 73.00 | 233.00 |
| 661 | 219.69 | 66.59 | 67.00 | 225.00 | 89.00 | 126.00 |
| 662 | 145.38 | 10.20 | 67.00 | 225.00 | 18.00 | 83.00  |
| 663 | 145.81 | 11.18 | 67.00 | 225.00 | 83.00 | 51.00  |
| 664 | 155.55 | 23.65 | 54.00 | 222.00 | 23.00 | 160.00 |
| 665 | 156.61 | 24.80 | 54.00 | 222.00 | 73.00 | 233.00 |
| 666 | 220.63 | 53.83 | 54.00 | 222.00 | 89.00 | 126.00 |
| 667 | 144.65 | 10.39 | 54.00 | 222.00 | 18.00 | 83.00  |
| 668 | 145.74 | 11.81 | 54.00 | 222.00 | 83.00 | 51.00  |

---
